# Supplementary material
Source: PubMed Central journal article supplement (PMC3911039)
Supplement: AEM.03461-13_zam999105154so1.pdf [file AEM.03461-13_zam999105154so1.pdf]

1 **Supporting material**

2

3

4 **Disruption of Putrescine Biosynthesis in *Shewanella oneidensis* Enhances**  
5 **Biofilm Cohesiveness and Performance in Cr(VI) Immobilization**

6

7 Yuanzhao Ding,<sup>1,2</sup> Ni Peng,<sup>3</sup> Yonghua Du,<sup>4</sup> Lianghai Ji,<sup>3</sup> Bin Cao<sup>1,5,\*</sup>

8

9 <sup>1</sup>Singapore Centre on Environmental Life Sciences Engineering, Nanyang  
10 Technological University, Singapore

11 <sup>2</sup>Interdisciplinary Graduate School, Nanyang Technological University, Singapore

12 <sup>3</sup>Temasek Life Sciences Laboratory, Singapore

13 <sup>4</sup>Institute of Chemical and Engineering Sciences, A\*STAR, Singapore

14 <sup>5</sup>School of Civil and Environmental Engineering, Nanyang Technological University,  
15 Singapore

16

17 **\*Corresponding author:** Bin Cao, Singapore Centre on Environmental Life Sciences

18 Engineering, and School of Civil and Environmental Engineering, Nanyang

19 Technological University, Singapore 637551. Fax: +65 6316 7349; Tel: +65 6592 7895.

20 E-mail: bincao@ntu.edu.sg

21

22

23

24

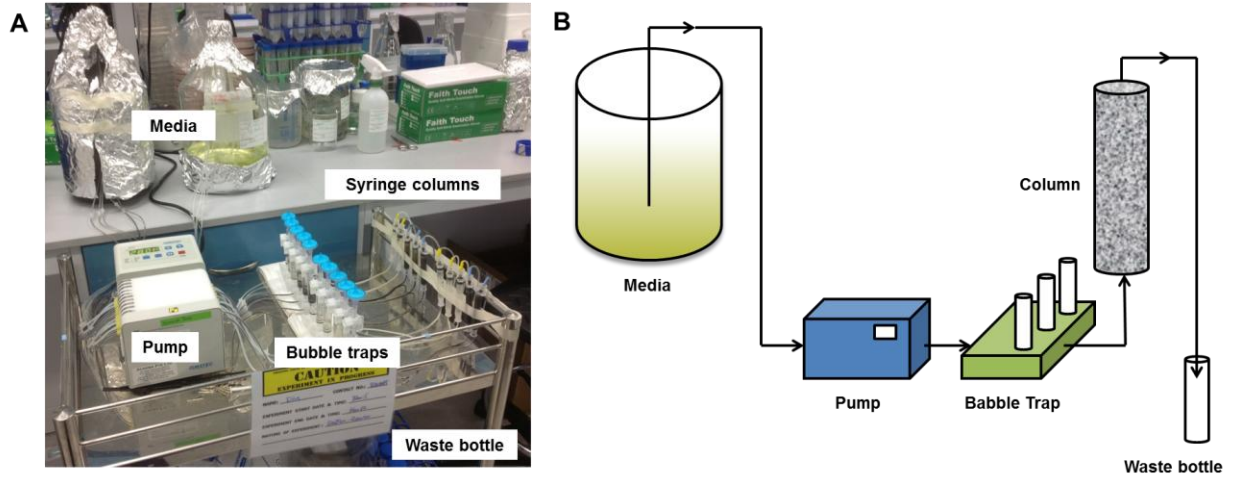

25

26 **Fig. S1.** (A) Experimental setup and (B) a schematic illustration of the submerged  
27 biofilm reactors used in this study.

28

29

30

31

32

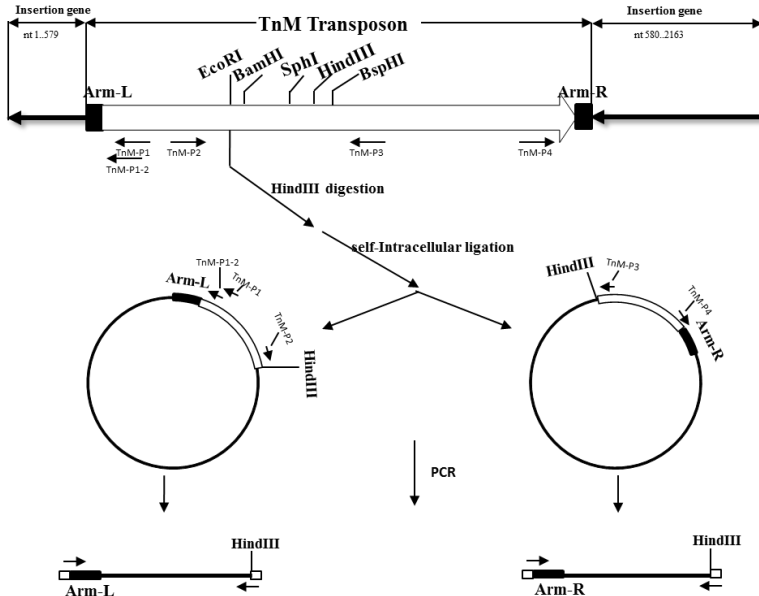

33

34 **Fig. S2.** Illustration of the inverse PCR method used in this study. Inverse PCR  
 35 products were purified with Qiagen QIAquick Gel Extraction Kit and subsequently used  
 36 as templates for sequencing analysis. DNA sequencing was carried out using the same  
 37 primers adapted in inverse PCR.

38

39

40

41

42

43

44

45

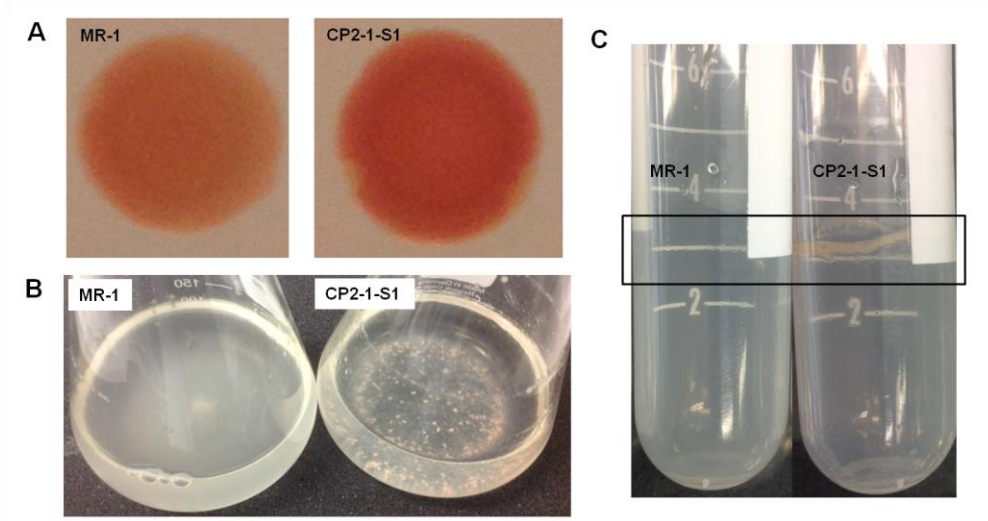

46

47

48

49

50

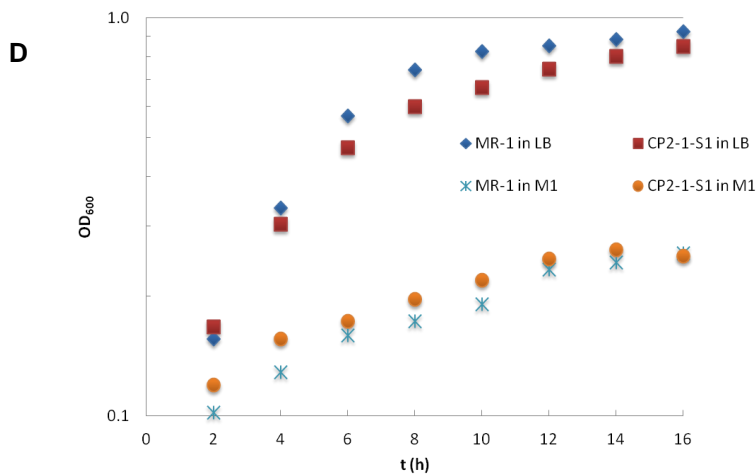

51 **Fig. S3.** The hyper-adherent phenotype of the mutant strain CP2-1-S1 (compared to *S.*

52 *oneidensis* MR-1 WT): (A) Colonies formed on MM1 agar containing Congo red dye

53 after 5-day incubation at 30°C; (B) 16-h planktonic cultures in MM1 medium; (C) Cell

54 adhesion onto the wall of culture tubes in 16-h planktonic cultures in MM1 medium; (D)

55 Representative growth profiles of the WT and CP2-1-S1 in LB and MM1 medium

56 (growth assay in a 96-well plate with shaking).

57

58  
59  
60  
61  
62  
63  
64  
65  
66  
67  
68  
69  
70  
71  
72  
73  
74  
75  
76  
77  
78  
79  
80

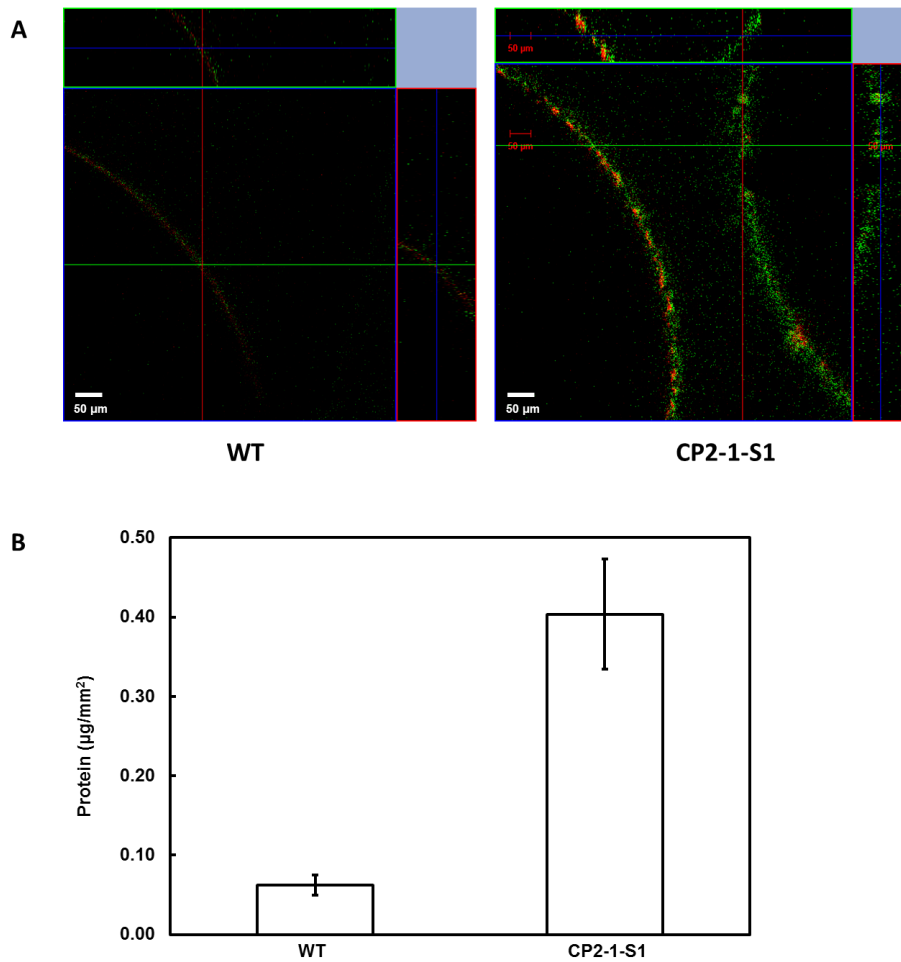

**Fig. S4.** Comparative analysis of the biofilms formed by CP2-1-S1 and the WT on glass beads in submerged biofilm reactors: (A) representative CLSM images. Live cells were stained green and dead cells were stained red and yellow with the LIVE/DEAD stain. (B) total amount of proteins per mm<sup>2</sup>. Data are presented as means ± standard deviations (n = 3).

81

82

83

84

85

86

87

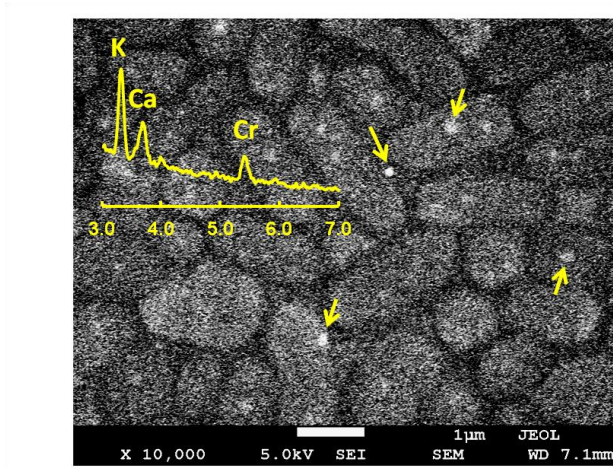

88 **Fig. S5.** A representative SEM-EDX spectrum showing Cr precipitates (indicated by  
89 arrows) in *S. oneidensis* biofilms after 56-h exposure to Cr(VI).

90

91

92

93

94

95

96

97

98

A

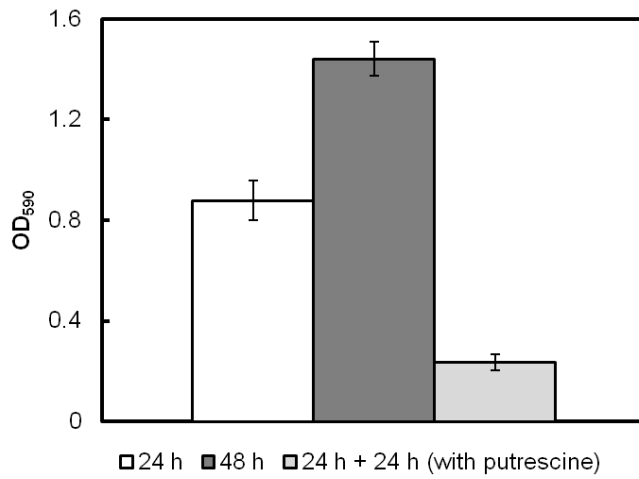

100

101

102

103 B

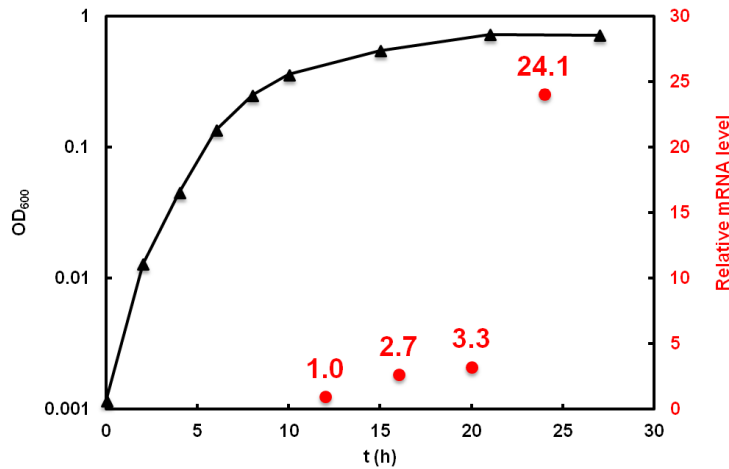

104

105

106

107

108 **Fig. S6.** (A) Dissolution of CP2-1-S1 biofilms by putrescine: CP2-1-S1 was growing for  
109 24 h in a 96-well plate biofilm assay; then putrescine was added (final concentration 1  
110 mM) and the cultures were incubated for another 24 h. (B) Expression of *speF* in *S.*  
111 *oneidensis* MR-1 growing in LB medium (planktonic cultures) revealed by qPCR  
112 analysis.

113

114

115 **Table S1.** Primers used for inverse PCR amplification.

| Primer   | Sequence                       |
|----------|--------------------------------|
| TnM-P1   | 5'-CGACATCATAACGGTTCTGGCA-3'   |
| TnM-P1-2 | 5'-TGTGTGGAATTGTGAGCGGATA-3'   |
| TnM-P2   | 5'-CACCGTGCAGTCGATGATAAGC-3'   |
| TnM-P3   | 5'-CGCGCAGATCAGTTGGAAGAAT-3'   |
| TnM-P4   | 5'-CCGCCACCTAACCAATTCGTTCAA-3' |

116

117
